RESEARCH ARTICLE

# The methylenetetrahydrofolate reductase c.c.677 C>T and c.c.1298 A>C polymorphisms in reproductive failures: Experience from an RSA and RIF study on a Polish population

Izabela Nowak<sup>1\*</sup>, Aleksandra Bylińska<sup>1</sup>, Karolina Wilczyńska<sup>1</sup>, Andrzej Wiśniewski<sup>1</sup>, Andrzej Malinowski<sup>2</sup>, Jacek R. Wilczyński<sup>3</sup>, Paweł Radwan<sup>4,5</sup>, Michał Radwan<sup>4</sup>, Ewa Barcz<sup>6</sup>, Rafał Płoski<sup>7</sup>, Hanna Motak-Pochrzęst<sup>8,9</sup>, Małgorzata Banasik<sup>10</sup>, Maciej Sobczyński<sup>11</sup>, Piotr Kuśnierzcyk<sup>1</sup>

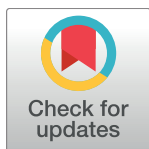

**1** Department of Clinical Immunology, Laboratory of Immunogenetics and Tissue Immunology, Hirszfeld Institute of Immunology and Experimental Therapy, Polish Academy of Sciences, Wrocław, Poland, **2** Department of Surgical, Endoscopic and Oncologic Gynecology, Polish Mothers' Memorial Hospital—Research Institute, Łódź, Poland, **3** Department of Gynecology and Gynecologic Oncology, Polish Mothers' Memorial Hospital—Research Institute, Łódź, Poland, **4** Department of Reproductive Medicine, Gameta Hospital, Rzgów, Poland, **5** Biogeno—Regional Science-Technology Center, Podzamcze, Poland, **6** First Chair and Clinic of Obstetrics and Gynecology, Medical University of Warsaw, Warszawa, Poland, **7** Department of Medical Genetics, Center of Biostructure Research, Medical University of Warsaw, Warszawa, Poland, **8** Faculty of Physical Education and Physiotherapy, Opole University of Technology, Opole, Poland, **9** Obstetric Gynecological Department, District Hospital Strzelce Opolskie, Strzelce Opolskie, Poland, **10** APC—Medical Analyses, Łódź, Poland, **11** Department of Genomics, Faculty of Biotechnology, University of Wrocław, Wrocław, Poland

\* [izan@iitd.pan.wroc.pl](mailto:izan@iitd.pan.wroc.pl)

**OPEN ACCESS**

**Citation:** Nowak I, Bylińska A, Wilczyńska K, Wiśniewski A, Malinowski A, Wilczyński JR, et al. (2017) The methylenetetrahydrofolate reductase c.c.677 C>T and c.c.1298 A>C polymorphisms in reproductive failures: Experience from an RSA and RIF study on a Polish population. PLoS ONE 12 (10): e0186022. <https://doi.org/10.1371/journal.pone.0186022>

**Editor:** Joël R Drevet, Université Clermont Auvergne, FRANCE

**Received:** May 6, 2017

**Accepted:** September 22, 2017

**Published:** October 26, 2017

**Copyright:** © 2017 Nowak et al. This is an open access article distributed under the terms of the [Creative Commons Attribution License](https://creativecommons.org/licenses/by/4.0/), which permits unrestricted use, distribution, and reproduction in any medium, provided the original author and source are credited.

**Data Availability Statement:** All relevant data are within the paper and its Supporting Information files.

**Funding:** This work was supported by National Science Centre, Poland, 2014/13/B/NZ5/00273 and N N401 588340, Dr. Izabela Nowak and Wrocław Centre of Biotechnology, the programme The Leading National Research Centre (KNOW) for years 2014–2018 (to I. Nowak, Ph.D.).

## Abstract

Almost 1600 individuals from the Polish population were recruited to this study. Among them 319 were fertile couples, 289 were recurrent spontaneous abortion (RSA) couples, and 131 were in the group of recurrent implantation failure (RIF) following in vitro fertilization. The aim of this study was to evaluate the *MTHFR* c.c.677 C>T and c.c.1298 A>C polymorphisms' association with RSA and RIF. We used PCR-RFLP with *HinfI* (677 C>T) and *MbolI* (1298 A>C) digestion. We observed a protective effect of the female AC genotype (OR = 0.64,  $p = 0.01$ ) and the C allele (AC+CC genotypes; OR = 0.65,  $p = 0.009$ ) against RSA. Moreover, 1298 AA/677 CT women were more frequent in RSA (31.14%) and RIF (25.20%) groups in comparison to fertile women (22.88%), although this difference was significant only in the case of RSA ( $p = 0.022$ , OR = 1.52). Male combined genotype analysis revealed no association with reproductive failure of their partners. Nevertheless, the female/male combination AA/AC of the 1298 polymorphism was more frequent in RSA couples ( $p = 0.049$ , OR = 1.49). However, the significant results became insignificant after Bonferroni correction. In addition, analysis of haplotypes showed significantly higher frequency of the C/C haplotype (1298 C/677 C) in the female control group than in the female RSA group ( $p = 0.03$ , OR = 0.77). Moreover, the association between elevated homocysteine (Hcy) level in plasma of RSA and RIF women and *MTHFR* polymorphisms was investigated but did not reveal significant differences. In conclusion, for clinical practice, it is better to check the

**Competing interests:** The authors have declared that no competing interests exist. APC – Medical Analyses does not alter our adherence to PLOS ONE policies on sharing data and materials.

homocysteine level in plasma and, if the Hcy level is increased, to recommend patients to take folic acid supplements rather than undergo screening of *MTHFR* for 1298 A>C and 677 C>T polymorphisms.

## Introduction

Nowadays, recurrent spontaneous abortion (RSA) and recurrent implantation failure after *in vitro* fertilization (RIF) are implicated as the most frustrating clinical conditions for both couples who have problems with conceiving and maintaining pregnancy and for doctors who cannot help patients, especially in RIF cases [1]. Natural conception in the female body remains to some extent an enigmatic phenomenon, whereas *in vitro* fertilization (IVF) with subsequent embryo transfer provides clinicians some information about when the embryo was transferred and whether implantation has actually occurred. Hence, recurrent implantation failure should become a clinically identifiable phenomenon. Unfortunately, clinicians are still observing increasing numbers of RSA and RIF cases and they are implementing expanded diagnostics in the quest for the cause of this situation as soon as a woman experiences 2 consecutive miscarriages or cannot become pregnant after a repeated IVF. The incidence of RSA in women of reproductive age has been reported to be 1–2%, and about 60% of these were idiopathic [2,3]. The RIF prevalence rate in women following IVF treatment is approximately 10% [4].

Many factors contribute to these reproductive failures, including the woman's age, oocyte and sperm quality, parental chromosomal anomalies, genetic or metabolic abnormalities of the embryo, and poor uterine receptivity. What is more, immunological disturbances in the implantation site, endometriosis, uterine fibroids, hydrosalpinx, and endometrial polyps could negatively affect the implantation rate [1,4–6]. Both inherited and acquired thrombophilic factors are also believed to impair the reproductive outcome by thrombosis of maternal vessels causing a diminished perfusion of the intervillous space, and therefore leading to defect of implantation and placentation [7–9].

One of the key enzymes which could affect the thrombotic status and folate metabolism in humans is methylenetetrahydrofolate reductase (MTHFR). It catalyzes formation of 5-methyltetrahydrofolate, which is involved in the methylation of homocysteine (Hcy) to methionine. The C to T substitution in the c.c.677 position in the *MTHFR* gene (rs1801133, OMIM accession number 607093.0003) leads to an amino acid change from alanine to valine within the N-terminal catalytic domain of the enzyme and subsequent reduced enzymatic activity of MTHFR. A second common variant, which is also implicated in the reduction of MTHFR enzyme activity, is the c.c.1298 A>C polymorphism (rs1801131, OMIM accession number 607093.0004). It leads to substitution of glutamate to alanine in the C-terminal regulatory domain of the enzyme. The *MTHFR* 677 TT genotype results in 30% enzyme activity *in vitro* compared with the CC wild-type, whereas the *MTHFR* 1298 CC genotype has been found to result in 60% enzyme activity *in vitro* compared to the AA wild-type. No individuals were found homozygous for both mutations [10–12]. In turn, decreased enzymatic activity of MTHFR entails increased concentrations of Hcy in body fluids, especially when the folate status is low. Elevated plasma Hcy levels are associated with increased odds of venous and arterial thrombosis. An excess of homocysteine can affect the developing gametes and embryo by DNA damage and improper methylation [13]. Both polymorphisms have been associated with DNA hypomethylation [14].

Whereas *MTHFR* polymorphisms have been widely investigated in RSA case-control and meta-analysis studies [15–17], the association of RIF with *MTHFR* polymorphisms has been

evaluated in only a few studies [7,18–20]. The results and conclusions were contradictory, even between meta-analysis studies [8,15,21]. Most of the studies have referred only to women, although testing male partners might be important too, owing to the fact that *MTHFR* polymorphisms in 677 C>T and 1298 A>C were reported to be associated with worse parameters of semen and male infertility [13,22,23]. Therefore, we decided to include men in our research as well.

The aim of this study was to evaluate the association between *MTHFR* 677 C>T and 1298 A>C polymorphisms and the reproductive outcome in RSA and RIF in the Polish population. This is the first such large study involving a homogeneous population in which women and their partners from control, RSA, and RIF groups of reproductive age were compared. Likewise, we analyzed the role of *MTHFR* polymorphism on the homocysteine level detected in plasma of RSA and RIF female patients.

## Materials and methods

### Study design

Almost 1600 individuals from the Polish population were originally included in this study. All spontaneous miscarriage patients (and their partners) were recruited from the Department of Surgical, Endoscopic and Oncologic Gynecology and the Department of Gynecology and Gynecologic Oncology, Polish Mothers' Memorial Hospital–Research Institute, and the Clinic of Obstetrics and Gynecology, Medical University of Warsaw. We tested 289 couples, who suffered from two to eight consecutive spontaneous miscarriages (RSA). The inclusion of RSA couples in the study took place according to recommendations of the Practice Committee of the American Society for Reproductive Medicine, 2013 [24]. Couples, free from chromosomal aberrations (with euploid karyotypes of parents), uterine anomalies, hormonal disturbances, and infections with *Toxoplasma*, *Chlamydia*, *Listeria*, and *Brucella*, were qualified. This group consisted of 205 women who experienced 3 or more first trimester spontaneous abortion incidents with the same partner (mean age 32.82 years  $\pm$  4.02; age range 24–46) and 84 women with 2 miscarriages (mean age 32.82 years  $\pm$  4.03; age range 25–41). Nearly all women were primary aborters and miscarriages recurred at the same gestational age up to 12 weeks of gestation (98%).

One hundred thirty-one recurrent implantation failure couples were recruited from the Department of Reproductive Medicine, Gameta Hospital and Polish Mothers' Memorial Hospital–Research Institute. RIF was defined as the failure to achieve a clinical pregnancy after transfer of at least 4 good-quality embryos in a minimum of three fresh or frozen cycles in a woman under the age of 40 years [6]. However, some clinicians have indicated that couples with two consecutive unsuccessful attempts of IVF-ET should also be included in RIF, similarly to the recent redefinition of recurrent pregnancy loss by the American Society for Reproductive Medicine (2013) [25]. In our study indications for IVF-ET were as follows: male factor (22.14%), female factor (22.14%), both factors (16.79%), or unexplained infertility (38.93%). The male factor consisted of abnormalities of semen in sperm count, vitality and motility and their morphology. The female factor comprised anatomic factors, including congenital uterine abnormalities, endometrial polyps, uterine fibroids, adhesions, hydrosalpinges, endometriosis, tubal factor, polycystic ovarian syndrome, ovulation dysfunction.

Homocysteine level was tested by immunoassay technique using the Immulite 2000 XPi analyzer.

The control group was selected in the 1st Department of Obstetrics and Gynecology, Medical University of Warsaw and the District Hospital Strzelce Opolskie. This group comprised 219 healthy couples with at least 2 healthy-born children and no history of miscarriage or

endocrinological or immunological disorders. Details concerning this control group were described by Nowak et al. [26,27]. In addition, we decided to include 100 couples with one healthy-born child from anonymous paternity testing to increase the group of fertile couples to 319 to make our study stronger and more reliable. We also included their 100 children to assess the inheritance of *MTHFR* alleles. However, we did not possess any data about this group of fertile families, as they were anonymous participants in paternity cases. Detailed information about tested individuals is presented in Table 1. The study was approved by the Scientific Research Ethics Committee at the Polish Mothers' Memorial Hospital Research Institute, no. 16/2014, and by the Local Ethics Committee of the Medical University of Wrocław. Informed written consent was obtained from the subjects.

### DNA preparation and genotyping

Genomic DNA was isolated from venous blood by using the Invisorb Spin Blood Midi Kit (Invitex, Berlin, Germany) according to the manufacturer's instructions. Procedures of *MTHFR* 677 C>T and 1298 A>C genotyping have been published recently in detail in supplementary material of our article [27].

### Statistical analysis

The frequencies of tested genotypes and alleles were estimated by direct counting. The genotype distributions of each single-nucleotide polymorphism in the case and control groups were compared by two-tailed Fisher's exact test using GraphPad InStat version 3.06 software (San Diego, CA, USA).  $p < 0.05$  was considered statistically significant. If  $p < 0.05$ , it was corrected ( $p_{corr.}$ ) by the number of comparisons using Bonferroni correction. For 2x2 tables the odds ratio (OR) and 95% confidence interval for it were also calculated. Hardy-Weinberg equilibrium was checked using the chi-square test with one degree of freedom. All genotype frequencies were in Hardy-Weinberg equilibrium. We used FAMHAP version 19 software (<http://famhap.meb.uni-bonn.de/>) for estimation of haplotype frequencies and SHEsis software for calculation of differences between the control group and RSA and RIF groups [28].

**Table 1. Characteristics of study population.**

| Attribute                                                         | Control             | RSA                 | RIF                                                                                                                 |
|-------------------------------------------------------------------|---------------------|---------------------|---------------------------------------------------------------------------------------------------------------------|
| <b>Maternal</b>                                                   | <b>N = 219</b>      | <b>N = 289</b>      | <b>N = 131</b>                                                                                                      |
| Age, mean ± SD; range                                             | 32.29 ± 5.81; 22–62 | 32.82 ± 4.02; 24–46 | 34.20 ± 3.61; 26–40                                                                                                 |
| <b>Paternal</b>                                                   | <b>N = 219</b>      | <b>N = 282</b>      | <b>N = 126</b>                                                                                                      |
| Age, mean ± SD; range                                             | 33.97 ± 6.18; 25–70 | 34.14 ± 3.19; 27–41 | 35.11 ± 4.34; 25–46                                                                                                 |
| Indications for IVF-embryo transfer (%)                           | NA                  | NA                  | Male factor—29 (22.14)<br>Female factor—29 (22.14)<br>Both factors—22 (16.79)<br>Unexplained infertility—51 (38.93) |
| Number of miscarriages after natural conception, mean ± SD; range | 0                   | 3.09 ± 1.24; 2–8    | 0                                                                                                                   |
| Number of pregnancies after IVF-ET, mean ± SD; range              | NA                  | NA                  | 1.08 ± 1.19; 0–5                                                                                                    |
| Number of miscarriages after IVF-ET, mean ± SD; range             | NA                  | NA                  | 0.20 ± 0.40; 0–1                                                                                                    |
| Number of previous implantation failures, mean ± SD; range        | NA                  | NA                  | 3.83 ± 1.54; 2–8                                                                                                    |
| Number of embryo transfers, mean ± SD; range                      | NA                  | NA                  | 4.66 ± 2.09; 2–12                                                                                                   |

RSA, recurrent spontaneous abortion; RIF, recurrent implantation failure; IVF-ET, *in vitro* fertilization–embryo transfer; NA, not applicable; SD, standard deviation; Male factor—abnormalities of semen in sperm count, vitality and motility; Female factor—endometriosis, tubal factor, polycystic ovarian syndrome, ovulation dysfunction; Data for the control group concern only 219 couples with 2 healthy-born children with the same partner. The remaining 100 couples from paternity testing were fully anonymous.

<https://doi.org/10.1371/journal.pone.0186022.t001>

## Results

To examine the association of *MTHFR* gene polymorphism with RSA and RIF, two single nucleotide polymorphisms, 677 C>T and 1298 A>C, were chosen. The genotype and minor allele frequencies for women and their partners from tested groups and controls are presented in [S1 Table](#). We did not observe any differences in the frequencies of genotypes and minor allele frequency of the *MTHFR* 677 C>T between RSA or RIF women and fertile controls, or between their male partners and controls. In contrast, we found a protective effect of the 1298 AC genotype ( $p = 0.01$ , OR = 0.64) and carriers of the C allele (AC+CC genotypes;  $p = 0.009$ , OR = 0.65) against RSA, when comparing RSA and control women. No such effect was observed for RIF.

The combined 1298/677 genotype analysis is presented in [S2 Table](#). AA/CT women were more frequent in RSA (31.14%) and RIF (25.20%) groups in comparison to fertile women (22.88%), but only in the case of RSA was this difference significant ( $p = 0.022$ , OR = 1.52), and after Bonferroni correction this significance was lost ( $p_{corr} = 0.15$ ). Male combined genotype analysis revealed no association with reproductive failure of their female partners. What is more, no individuals were found homozygous for both mutations.

When we analyzed combined female/male genotype, we observed that AA/AC genotype of the 1298 *MTHFR* polymorphism was more frequent in RSA and RIF groups than in the control group, but only in the RSA group was borderline significance achieved ([S3 Table](#),  $p = 0.049$ , OR = 1.49), which was lost after the correction for multiple testing ( $p_{corr} = 0.44$ ). Furthermore, no association of female/male combined 677 C>T *MTHFR* genotypes was found with RSA and RIF.

Haplotype analysis is depicted in [S4 Table](#). The frequency of haplotypes in women from all tested groups were similar except for C/C haplotype (1298C/677C). Significantly higher frequency of this haplotype was observed in the control group than the RSA group ( $p = 0.03$ , OR = 0.77). Also, the distribution of haplotypes in men did not indicate any association between male haplotypes and RSA or RIF.

[Table 2](#) summarizes the effects of the *MTHFR* 1298 A>C and 677 C>T polymorphisms on the susceptibility to RSA.

Because *MTHFR* polymorphism in positions 1298 and 677 could affect the level of homocysteine in body fluids, and, what is also important, we had available data for the presence or absence of homocysteine in plasma of the 249 RSA and 80 RIF women, we decided to include this clinical information in the statistical analysis. Only 19 (7.63%) patients from the RSA group and 13 (16.25%) from the RIF group possessed an elevated level of homocysteine. [Table 3](#) illustrates the distribution of genotypes of tested polymorphisms in RSA and RIF groups according to the presence ( $\geq 12 \mu\text{M/L}$ ) or absence (lack or below  $12 \mu\text{M/L}$ ) of homocysteine (Hcy). We did not find significant differences in distribution of the 1298 and 677 *MTHFR* genotypes between Hcy-positive and Hcy-negative patients.

**Table 2. Summary of the effects of *MTHFR* 1298 A>C and 677 C>T polymorphisms on susceptibility to RSA.**

| Polymorphism                   | Associated genotype or haplotype | Comparison                     | Table | P, OR (95% CI)          | Effect |
|--------------------------------|----------------------------------|--------------------------------|-------|-------------------------|--------|
| Female 1298 A>C                | AC                               | RSA vs Control                 | S1    | 0.010, 0.64 (0.45–0.89) | ↓      |
| Female 1298 A>C                | AC+CC                            | RSA vs Control                 | S1    | 0.009, 0.65 (0.47–0.90) | ↓      |
| Female 1298 C>A/female 677 C>T | AA/CT                            | RSA vs Control                 | S2    | 0.022, 1.52 (1.07–2.19) | ↑      |
| Female 1298 A>C /male 1298 A>C | AA/AC                            | RSA couples vs Control couples | S3    | 0.049, 1.49 (1.01–2.17) | ↑      |
| Female 1298 A>C/677 C>T        | C/C                              | RSA vs Control                 | S4    | 0.030, 0.77 (0.60–0.98) | ↓      |

↓ protection; ↑ susceptibility

<https://doi.org/10.1371/journal.pone.0186022.t002>



### Discussion

In this study we aimed to investigate whether genetic *MTHFR* polymorphisms in 1298 A>C and 677 C>T are associated with reproductive failure, namely RSA and RIF. Moreover, we tried to elucidate the effect of *MTHFR* polymorphism on the homocysteine level in plasma of RSA and RIF patients. The main result is the protective effect of the *MTHFR* 1298 AC genotype (OR = 0.67, *p* = 0.01) and carriage of the C allele (AC+CC genotypes, OR = 0.65, *p* = 0.009) against RSA (S1 Table). The AC genotype frequency in our fertile female population was 47.65%, and it was similar to the frequency of 47.88% reported by Wolski et al. [29] from a study of 662 Polish women. Moreover, in our study, the frequency of the AC genotype of fertile women did not differ significantly from the frequency observed in fertile men. Also, the frequencies of combined 1298/677 genotypes were similar to those reported by Wolski et al. [29]. It should be noted that the protective 1298 AC genotype appeared mostly in combination with wild-type CC genotype of the 677 polymorphism, and it was more prevalent in the control group, although not significantly (S2 Table, *p* = 0.07). Furthermore, analysis of haplotypes proved that the 1298C allele protects from RSA only in the haplotype with the C allele in the 677 position (S4 Table). Therefore, we should test not only 1298 A>C *MTHFR* polymorphism but also 677 C>T, and each significant result should be considered with caution, because in our population the 1298 AC genotype with one mutated allele seems harmless. This mutation does not affect the thermolability or FAD release activity of the MTHFR enzyme [30,31]; however, mutation in 677 C>T could change the enzyme structure and the mRNA properties, as was reported recently by Nikzad et al. [32]. An *in silico* analysis of the wild-type and mutant 677 C>T mRNA indicated the removal of two loops in the secondary structure of mutant mRNA. Therefore, 222Val was more unstable than 222Ala in the MTHFR mRNA structure, which could influence expression of the protein [32].

Because we observed significantly higher frequency of the female 1298 AA/677 CT genotype in the RSA group, we might suppose that it could be important in susceptibility to RSA.

**Table 3. Distribution of genotypes in RSA and RIF groups according to the presence or absence of homocysteine (Hcy).**

|                     | RSA                              |           |           |     | RIF                              |           |            |     |
|---------------------|----------------------------------|-----------|-----------|-----|----------------------------------|-----------|------------|-----|
|                     | AA                               | AC        | CC        | Σ   | AA                               | AC        | CC         | Σ   |
| <b>1298 A&gt;C</b>  |                                  |           |           |     |                                  |           |            |     |
| <b>Hcy positive</b> | 9                                | 8         | 2         | 19  | 6                                | 6         | 1          | 13  |
| %                   | 47.37                            | 42.10     | 10.53     | 100 | 46.15                            | 46.15     | 7.70       | 100 |
| <b>Hcy negative</b> | 121                              | 88        | 21        | 230 | 38                               | 24        | 5          | 67  |
| %                   | 52.61                            | 38.26     | 9.13      | 100 | 56.72                            | 35.82     | 7.46       | 100 |
| <b>OR</b>           | 1                                | 1.17      | 1.17      | -   | 1                                | 1.58      | 1.27       | -   |
| <b>CI 95%</b>       | -                                | 0.45–3.03 | 0.25–5.42 | -   | -                                | 0.46–5.48 | 0.12–12.81 | -   |
|                     | $\chi^2_{df=1} = 0.18; p = 0.67$ |           |           |     | $\chi^2_{df=1} = 0.32; p = 0.57$ |           |            |     |
|                     | RSA                              |           |           |     | RIF                              |           |            |     |
|                     | CC                               | CT        | TT        | Σ   | CC                               | CT        | TT         | Σ   |
| <b>677 C&gt;T</b>   |                                  |           |           |     |                                  |           |            |     |
| <b>Hcy positive</b> | 6                                | 9         | 4         | 19  | 6                                | 5         | 2          | 13  |
| %                   | 31.58                            | 47.37     | 21.05     | 100 | 46.15                            | 38.46     | 15.39      | 100 |
| <b>Hcy negative</b> | 93                               | 118       | 19        | 230 | 36                               | 29        | 2          | 67  |
| %                   | 40.44                            | 51.30     | 8.26      | 100 | 53.73                            | 43.28     | 2.99       | 100 |
| <b>OR</b>           | 1                                | 0.85      | 2.96      | -   | 1                                | 1.03      | 6.00       | -   |
| <b>CI 95%</b>       | -                                | 0.34–2.18 | 0.89–9.82 | -   | -                                | 0.29–3.73 | 0.70–51.13 | -   |
|                     | $\chi^2_{df=1} = 2.07; p = 0.15$ |           |           |     | $\chi^2_{df=1} = 1.24; p = 0.26$ |           |            |     |

RSA, recurrent spontaneous abortion; RIF, recurrent implantation failure; IVF-ET, *in vitro* fertilization–embryo transfer; P, probability; OR, odds ratio; 95% CI, 95% confidence interval from two-sided Fisher’s exact test;  $\chi^2_{df=1}, p$ , chi-square test with one degree of freedom.

<https://doi.org/10.1371/journal.pone.0186022.t003>

However, the 1.52 odds ratio indicates a moderate risk of RSA for the 1298 AA/677 CT women (S2 Table). On the other hand, none of the combined genotypes of their partners showed a significant association. This result is consistent with a recently published meta-analysis by Perez et al. [15], and a study on the German population, in which paternal thrombophilic gene mutations were not associated with RSA [33]. However, another study, which was reported by Tara et al. [34], is divergent with that outcome. Their results showed male heterozygosity in 1298 A>C/677 C>T polymorphisms as a predisposing factor to RSA of their partners. Moreover, *MTHFR*-Ala222Val (677 C>T) polymorphism has been recently associated with Iranian male infertility [32,35]. Indeed, scientists found the 222Val allele (677T) and Val-Val (677TT) genotype significantly more frequent in oligozoospermic and azoospermic men. However, in our population of men with severe and very severe oligozoospermia we did not find similar results (unpublished data), which is consistent with the research published by Wu et al. [36]. They reported a meta-analysis study stratified by ethnicity, which indicated a strong association between *MTHFR* 677 C>T polymorphism and male infertility only in Asians, but not with Caucasian men.

We also found no association of *MTHFR* polymorphisms with recurrent implantation failure, and this is in accordance with Di Nisio et al. [8], who in a review and meta-analysis found no association of female *MTHFR* mutations with reproductive failure after IVF. However, the number of RIF patients (N = 131) in our study seems to be insufficient. This is one of the limitation of our study. Possibly, increasing this group size would produce similar results as those we observed for miscarriages.

The combined female/male genotype analysis indicated a very weak association of only one AA/AC 1298 genotype with RSA, and it does not seem plausible, because the correction for multiple testing was  $p > 0.05$ . In this case, 50% of fetuses would be AA (not mutated, with full enzyme activity) and 50% AC (with one mutated allele with minimal influence on the enzyme activity). On the other hand, analysis of maternal and fetal 1298 polymorphism in spontaneously aborted cases of the Indian population, and meta-analysis of 4 other studies, showed overrepresentation of the mutant alleles AC and CC [16]. However, the Indian population differs from the Caucasian population in many genetic aspects, and therefore our results could be different from the Asian population. Unfortunately, we had no available data concerning *MTHFR* polymorphisms from the fetal RSA group. The only information we had came from genotyping of 100 fertile families, and we may conclude that the inheritance of *MTHFR* follows a Mendelian pattern. Children did not differ from their mothers and fathers in genotype or haplotype frequencies (S5 Table). It should also be emphasized that no combined 1298 CC/677 TT homozygosity was observed in all our tested individuals. We cannot exclude that inheritance of such a genotype by an embryo could be lethal in very early embryo development. This observation has been reported in several studies [18,34].

An elevated female level of Hcy has been reported to impair DNA methylation and gene expression, causing defective chorionic villous vascularization in spontaneous miscarriage tissues [37]. Therefore, we included Hcy data in the analysis of a potential effect of *MTHFR* polymorphisms on the level of Hcy in plasma of RSA and RIF women. Analysis of the Hcy-positive and Hcy-negative RSA and RIF female patients with *MTHFR* genotypes revealed no effect of *MTHFR* polymorphism on the Hcy level. However, TT carriers of the 677 polymorphism in RSA and RIF more frequently possessed elevated levels of homocysteine, at increased odds ratios of 2.96 and 6.00, respectively. This is compatible with the study of Unfried et al. [38] showing that TT homozygosity in the *MTHFR* gene with hyperhomocysteinemia leads to a 3-fold increase in risk for early miscarriages. Moreover, Hekmatdoost et al. [17] found that plasma from idiopathic RSA patients with 1298 AC/677 TT genotype (three mutated alleles) differed significantly in Hcy value from plasma of patients with 1298 AA/677 CC genotype

(non-mutated allele). Unfortunately, we were unable to make such an analysis because of the low numbers of Hcy-positive RSA and RIF patients, which is the second limitation of our study. Also, the lack of data on plasma Hcy concentrations in men as well as on the dietary folate intake in all tested individuals is a further limitation preventing us from drawing comprehensive conclusions from the study.

There are many reports of *MTHFR* polymorphisms with reproductive disorders, but they are unfortunately contradictory, so the conclusions from the meta-analyses are unclear. It might be a consequence of poor quality of the case-control studies, as has often been admitted by the authors [8,15,21]. Some studies showed no association between *MTHFR* polymorphisms and IVF outcomes and RSA, and do not recommend routine testing or treatment of thrombophilia. They proposed rather a careful personal estimation of thrombotic complication risk, especially for women after ovarian stimulation [9,39]. The prevalence of *MTHFR* 1298 and 677 mutations is high in the general population, so the anticoagulation treatment should not be indicated and only supplementation with folic acid is warranted. Indeed, in the clinical practice in Poland, we observed RSA patients with elevated Hcy which, after supplementation of folic acid, decreased to the reference level (unpublished observation). Therefore, we agree with others [9,39] that, for clinical practice, it is better to check the homocysteine level in plasma and, if the Hcy level is increased, to order patients to supplement themselves with folic acid rather than to undergo screening for *MTHFR* 1298 A>C and 677 C>T polymorphisms.

## Supporting information

**S1 Table. Genotype frequencies and minor allele frequencies of *MTHFR* 677 C>T and *MTHFR* 1298 A>C in controls, RSA, and RIF patients.**

(DOCX)

**S2 Table. Combined genotype frequencies of *MTHFR* 677 C>T and *MTHFR* 1298 A>C in controls, RSA, and RIF patients.**

(DOCX)

**S3 Table. Combined female/male genotype frequencies of *MTHFR* polymorphisms in controls, RSA, and RIF patients.**

(DOCX)

**S4 Table. Haplotype frequencies of the 1298 A>C and 677 C>T *MTHFR* polymorphisms in women and men from control, RSA and RIF groups.**

(DOCX)

**S5 Table. Genotype and haplotype frequencies of the 1298 A>C and 677 C>T *MTHFR* polymorphisms in 100 healthy families.**

(DOC)

## Acknowledgments

The authors are grateful to our volunteers for the donation of blood and their agreement to use their clinical data in this study.

## Author Contributions

**Conceptualization:** Izabela Nowak.

**Data curation:** Izabela Nowak.



**Formal analysis:** Izabela Nowak, Aleksandra Bylińska, Karolina Wilczyńska, Andrzej Wiśniewski, Maciej Sobczyński.

**Funding acquisition:** Izabela Nowak.

**Investigation:** Aleksandra Bylińska, Karolina Wilczyńska, Małgorzata Banasik.

**Methodology:** Izabela Nowak.

**Project administration:** Izabela Nowak.

**Resources:** Andrzej Malinowski, Jacek R. Wilczyński, Paweł Radwan, Michał Radwan, Ewa Barcz, Rafał Płoski, Hanna Motak-Pochrzęst, Małgorzata Banasik.

**Software:** Andrzej Wiśniewski, Maciej Sobczyński.

**Supervision:** Piotr Kuśnierczyk.

**Validation:** Izabela Nowak.

**Visualization:** Izabela Nowak, Aleksandra Bylińska, Karolina Wilczyńska.

**Writing – original draft:** Izabela Nowak.

**Writing – review & editing:** Izabela Nowak, Piotr Kuśnierczyk.

## References

1. Timeva T, Shterev A, Kyurkchiev S. Recurrent Implantation Failure: The role of the endometrium. *J Reprod Infertil*. 2014; 15: 173–183. PMID: [25473625](#)
2. Diejomaoh MF. Recurrent spontaneous miscarriage is still a challenging diagnostic and therapeutic quagmire. *Med Princ Pract*. 2015; 24(Suppl 1): 38–55.
3. Sugiura-Ogasawara M, Ozaki Y, Suzumori N. Management of recurrent miscarriage. *J Obstet Gynaecol Res*. 2014; 40: 1174–1179. <https://doi.org/10.1111/jog.12388> PMID: [24754846](#)
4. Koot YEM, Teklenburg G, Salker MS, et al. Molecular aspects of implantation failure. *Biochim Biophys Acta*. 2012; 1822: 1943–1950. <https://doi.org/10.1016/j.bbadis.2012.05.017> PMID: [22683339](#)
5. Cakmak H, Taylor HS. Implantation failure: molecular mechanisms and clinical treatment. *Hum Reprod Update*. 2011; 17: 242–253. <https://doi.org/10.1093/humupd/dmq037> PMID: [20729534](#)
6. Coughlan C, Ledger W, Wang Q, Liu F, Demiroglu A, Gurgan T, et al. Recurrent implantation failure: definition and management. *Reprod Biomed Online*. 2014; 28: 14–38. <https://doi.org/10.1016/j.rbmo.2013.08.011> PMID: [24269084](#)
7. Qublan HS, Eid SS, Ababneh HA, Amarin ZO, Smadi AZ, Al-Khafaji FF, et al. Acquired and inherited thrombophilia: implication in recurrent IVF and embryo transfer failure. *Hum Reprod*. 2006; 21: 2694–2698. <https://doi.org/10.1093/humrep/del203> PMID: [16835215](#)
8. Di Nisio M, Rutjes AWS, Ferrante N, Tiboni GM, Cuccurullo F, Porreca E. Thrombophilia and outcomes of assisted reproduction technologies: a systemic review and meta-analysis. *Blood*. 2011; 118: 2670–2678. <https://doi.org/10.1182/blood-2011-03-340216> PMID: [21705498](#)
9. Ata B, Urman B. Thrombophilia and assisted reproduction technology—any detrimental impact or unnecessary overuse? *J Assist Reprod Genet*. 2016; 33: 1305–1310. <https://doi.org/10.1007/s10815-016-0771-8> PMID: [27423663](#)
10. Frosst P, Blom HJ, Milos R, Goyette P, Sheppard CA, Matthews RG, et al. A candidate genetic risk factor for vascular disease: A common mutation in methylenetetrahydrofolate reductase. *Nature Genetics*. 1995; 10: 111–113. <https://doi.org/10.1038/ng0595-111> PMID: [7647779](#)
11. Weisberg I, Tran P, Christensen B, Sibani S, Rozen R. A second genetic polymorphism in methylenetetrahydrofolate reductase (MTHFR) associated with decreased enzyme activity. *Mol Genet Metab*. 1998; 64: 169–172. <https://doi.org/10.1006/mgme.1998.2714> PMID: [9719624](#)
12. Levin BL, Varga E. MTHFR: Addressing genetic counseling dilemmas using evidence-based literature. *J Genet Couns*. 2016; 25: 901–911. <https://doi.org/10.1007/s10897-016-9956-7> PMID: [27130656](#)
13. Weiner AS, Boyarskikh UA, Voronina EN, Tupikin AE, Korolkova OV, et al. Polymorphisms in folate-metabolizing genes and risk of idiopathic male infertility: a study on a Russian population and meta-analysis. *Fertil Steril*. 2014; 101: 87–94. <https://doi.org/10.1016/j.fertnstert.2013.09.014> PMID: [24268703](#)

14. Castro R, Rivera I, Ravasco P, Camilo ME, Jakobs C, Blom HJ, et al. 5,10-methylenetetrahydrofolate reductase (MTHFR) 677C→T and 1298A→C mutations are associated with DNA hypomethylation. *J Med Genet*. 2004; 41: 454–458. <https://doi.org/10.1136/jmg.2003.017244> PMID: 15173232
15. Perez N, Ostojić S, Kapović M, Peterlin B. Systematic review and meta-analysis of genetic association studies in idiopathic recurrent spontaneous abortion. *Fertil Steril*. 2017; 107: 150–159. <https://doi.org/10.1016/j.fertnstert.2016.10.007> PMID: 27842992
16. Nair RR, Khanna A, Singh R, Singh K. Association of maternal and fetal MTHFR 1298 A>C polymorphism with the risk of pregnancy loss: a study of an Indian population and a meta-analysis. *Fertil Steril*. 2013; 99: 1311–1318. <https://doi.org/10.1016/j.fertnstert.2012.12.027> PMID: 23357458
17. Hekmatdoost A, Vahid F, Yari Z, Sadeghi M, Eini-Zinab H, Lakpour N, et al. Methyltetrahydrofolate vs folic acid supplementation in idiopathic recurrent miscarriage with respect to methylenetetrahydrofolate reductase 677 C>T and 1298 A>C polymorphisms: a randomized controlled trial. *PLoS One*. 2015; 2; 10:e0143569. <https://doi.org/10.1371/journal.pone.0143569> PMID: 26630680
18. Choi Y, Kim JO, Shim SH, Lee Y, Kim JH, Jeon YJ, et al. Genetic variation of methylenetetrahydrofolate reductase (MTHFR) and thymidylate synthase (TS) genes is associated with idiopathic recurrent implantation failure. *PLoS One*. 2016; 25; 11:e0160884. <https://doi.org/10.1371/journal.pone.0160884> PMID: 27560137
19. Simur A, Ozdemir S, Acar H, Colakoğlu MC, Görkemli H, Balci O, et al. Repeated in vitro fertilization failure and its relation with thrombophilia. *Gynecol Obstet Invest*. 2009; 67: 109–112. <https://doi.org/10.1159/000165776> PMID: 18957855
20. Azem F, Many A, Ben Ami I, Yovel I, Amit A, Lessing JB, et al. Increased rates of thrombophilia in women with repeated IVF failures. *Hum Reprod*. 2004; 19: 368–370. PMID: 14747183
21. Shi X, Xie X, Jia Y, Li S. Maternal genetic polymorphisms and unexplained recurrent miscarriage: a systematic review and meta-analysis. *Clin Genet*. 2017; 91: 265–284. <https://doi.org/10.1111/cge.12910> PMID: 27792840
22. Montjean D, Benkhalifa M, Dwssolle L, Cohen-Bacrie P, Belloc S, Siffroi JP, et al. Polymorphisms in MTHFR and MTRR genes associated with blood plasma homocysteine concentration and sperm counts. *Fertil Steril*. 2011; 95: 635–640. <https://doi.org/10.1016/j.fertnstert.2010.08.054> PMID: 20888556
23. Mfady DS, Sadiq MF, Khabour OF, Fararjeh AS, Abu-Awad A, Khader Y. Associations of variants in MTHFR and MTRR genes with male infertility in Jordanian population. *Gene*. 2014; 536: 40–44. <https://doi.org/10.1016/j.gene.2013.12.001> PMID: 24334125
24. Practice Committee of the American Society for Reproductive Medicine, Birmingham, Alabama. Definitions of infertility and recurrent pregnancy loss: a committee opinion. *Fertil Steril*. 2013; 99: 63. <https://doi.org/10.1016/j.fertnstert.2012.09.023> PMID: 23095139
25. Vlachadis N, Vrachnis N, Economou E, Siristatidis Ch. Zooming in on the definition of 'recurrent implantation failure'. *Reprod BioMed Online* 2014; 29: 144–145. <https://doi.org/10.1016/j.rbmo.2014.03.003> PMID: 24793191
26. Nowak I, Barcz E, Majorczyk E, Malinowski A, Wilczyński JR, Banasik M, et al. Genetic polymorphism of KIR2DL4 in the Polish population. *Tissue Antigens*. 2015; 85: 450–457. <https://doi.org/10.1111/tan.12544> PMID: 25818657
27. Nowak I, Malinowski A, Barcz E, Wilczyński J.R, Wagner M, Majorczyk E, et al. Possible role of HLA-G, LILRB1 and KIR2DL4 gene polymorphisms in spontaneous miscarriage. *Arch Immunol Ther Exp*. 2016; 64: 505–514.
28. Shi YY, He L. SHEsis, a powerful software platform for analyses of linkage disequilibrium, haplotype construction, and genetic association at polymorphism loci. *Cell Res*. 2005; 15: 97–98. <https://doi.org/10.1038/sj.cr.7290272> PMID: 15740637
29. Wolski H, Kocięcka M, Mrozikiewicz AE, Barlik M, Kurzawińska G. Coexistence of the 677C>T and 1298A>C MTHFR polymorphisms and its significance in the population of Polish women. *Ginekol Pol*. 2015; 86: 742–747. PMID: 26677583
30. Burda P, Suormala T, Heuberger D, Schäfer A, Fowler B, Froese DS, et al. Functional characterization of missense mutations in severe methylenetetrahydrofolate reductase deficiency using a human expression system. *J Inher Metab Dis*. 2017; 40: 297–306. <https://doi.org/10.1007/s10545-016-9987-0> PMID: 27743313
31. Weisberg IS, Jacques PF, Selhub J, Bostom AG, Chen Z, Curtis Ellison R, et al. The 1298A→C polymorphism in methylenetetrahydrofolate reductase (MTHFR): in vitro expression and association with homocysteine. *Atherosclerosis*. 2001; 156: 409–415. PMID: 11395038
32. Nikzad H, Karimian M, Sareban K, Khoshokhan M, Hosseinzadeh Colagar A. MTHFR-Ala222Val and male infertility: a study in Iranian men, an updated meta-analysis and an in silico-analysis. *Reprod BioMed Online*. 2015; 31: 668–680. <https://doi.org/10.1016/j.rbmo.2015.07.015> PMID: 26380869

33. Toth B, Vocke F, Rogenhofer N, Friese K, Thaler ChJ, Lohse P. Paternal thrombophilic gene mutations are not associated with recurrent miscarriage. *Am J Reprod Immunol*. 2008; 60: 325–332. <https://doi.org/10.1111/j.1600-0897.2008.00630.x> PMID: 18754836
34. Tara SS, Ghaemimanesh F, Zarei S, Reihani-Sabet F, Pahlevanzadeh Z, Modarresi MH, et al. Methylenetetrahydrofolate reductase 677 C>T and 1298 A>C polymorphisms in male partners of recurrent miscarriage couples. *J Reprod Infertil*. 2015; 16: 193–198. PMID: 27110516
35. Karimian M, Colagar AH. Association of C677T transition of the human methylenetetrahydrofolate reductase (MTHFR) gene with male infertility. *Reprod Fertil Dev*. 2016; 28: 785–794. <https://doi.org/10.1071/RD14186> PMID: 25412139
36. Wu W, Shen O, Qin Y, Lu J, Niu X, Zhou Z, et al. Methylenetetrahydrofolate reductase C677T polymorphism and the risk of male infertility: a meta-analysis. *Int J Androl*. 2012; 35: 18–24. <https://doi.org/10.1111/j.1365-2605.2011.01147.x> PMID: 21535009
37. Heby O. DNA methylation and polyamines in embryonic development and cancer. *Int J Dev Biol*. 1995; 39: 737–757. PMID: 8645558
38. Unfried G, Griesmacher A, Weismüller W, Nagele F, Huber JC, Tempfer CB. The 677 C>T polymorphism of the methylenetetrahydrofolate reductase gene and idiopathic recurrent miscarriage. *Obstet Gynecol*. 2002; 99: 614–619. PMID: 12039122
39. Tan X, Yu Z, Sao J, Chen L, Shen Y, Ding J, et al. Association between in vitro fertilization outcomes and inherited thrombophilias: a meta-analysis. *J Assist Reprod Genet*. 2016; 33: 1093–1098. <https://doi.org/10.1007/s10815-016-0726-0> PMID: 27216921
